# Supplementary material for: Inhibition of microRNA-155 regulates gastric mucosal barrier repair and inflammation by targeting SOCS1 for the treatment of acute gastritis
Source: Research Square preprint supplement (doi:10.21203/rs.3.rs-6971173/v1), 2025-07-28
Supplement: Supplementary file 1 [file ef15b7ab44c9d8c670164214.docx]

| Primer | Sequence |
| --- | --- |
| MicroRNA-155 Forward | 5’-TTAATGCTAATCGTGATA-3’ |
| MicroRNA-155 Reverse | 5’-AGTGCAGGGTCCGAGGTATT-3’ |
| U6 Forward | 5’-CTCGCTTCGGCAGCACA-3’ |
| U6 Reverse | 5’-AACGCTTCACGAATTTGCGT-3’ |
| TNFa Forward | 5’- CCGACCACCACTACAGCAAG -3’ |
| TNFa Reverse | 5’- GGGCAGGGAACCAGCATCTT -3’ |
| IL-1b Forward | 5’-ATGATGGCTTATTACAGTGGCAA-3’ |
| IL-1b Reverse | 5’-GTCGGAGATTCGTAGCTGGA-3’ |
| IL-6 Forward | 5’-TTCGGTCCAGTTGCCTTCTC-3’ |
| IL-6 Reverse | 5’-TCTTCTCCTGGGGGTACTGG-3’ |
| IL-18 Forward | 5’-TCTTCATTGACCAAGGAAATCGG-3’ |
| IL-18 Reverse | 5’-TCCGGGGTGCATTATCTCTAC-3’ |
| iNOs Forward | 5’- CGCATGACCTTGGTGTTTGG-3’ |
| iNOs Reverse | 5’- CATAGACCTTGGGCTTGCCA-3’ |
| FOSL2 Forward | 5’-CAGAAATTCCGGGTAGATATGCC-3’ |
| FOSL2 Reverse | 5’-GGTATGGGTTGGACATGGAGG-3’ |
| XKR4 Forward | 5’-CTTGCAGCTCGGGCAAATC-3’ |
| XKR4 Reverse | 5’-AGCATACTCACATCCGCATACT-3’ |
| HBP1 Forward | 5’-TCATCACCATTGGAAGGAGGA-3’ |
| HBP1 Reverse | 5’-TTGCACCATCCCAAATCATCA-3’ |
| SOCS1 Forward | 5’-CACGCACTTCCGCACATTC-3’ |
| SOCS1 Reverse | 5’-TAAGGGCGAAAAAGCAGTTCC-3’ |
| SEMA5A Forward | 5’-GATCCTGCCATTTACCGAAGC-3’ |
| SEMA5A Reverse | 5’-AGATGACACAAAGTTTGGCTCA-3’ |
| CSF1R Forward | 5’-GGGAATCCCAGTGATAGAGCC-3’ |
| CSF1R Reverse | 5’-TTGGAAGGTAGCGTTGTTGGT-3’ |
| SGK3 Forward | 5’-AAAGACGAGCAGGACTAAACG-3’ |
| SGK3 Reverse | 5’-GGACTGTCCATTTGAAGGAATGC-3’ |
| S1PR1 Forward | 5’-AACTGACCTCGGTGGTGTTC-3’ |
| S1PR1 Reverse | 5’-CTGCCAACAGGTCTGAGAGG-3’ |
| GAPDH Forward | 5’-CTGGGCTACACTGAGCACC-3’ |
| GAPDH Reverse | 5’-AAGTGGTCGTTGAGGGCAATG-3’ |
